# Supplementary figures and images for: Self-assembly of a molecular M8L12 cube having S6 symmetryElectronic supplementary information (ESI) available: Fig. S1 and S2. See http://www.rsc.org/suppdata/cc/b3/b307172n/
Source: Royal Society of Chemistry journal article supplement (doi:10.1039/b307172n), 2003-01-01

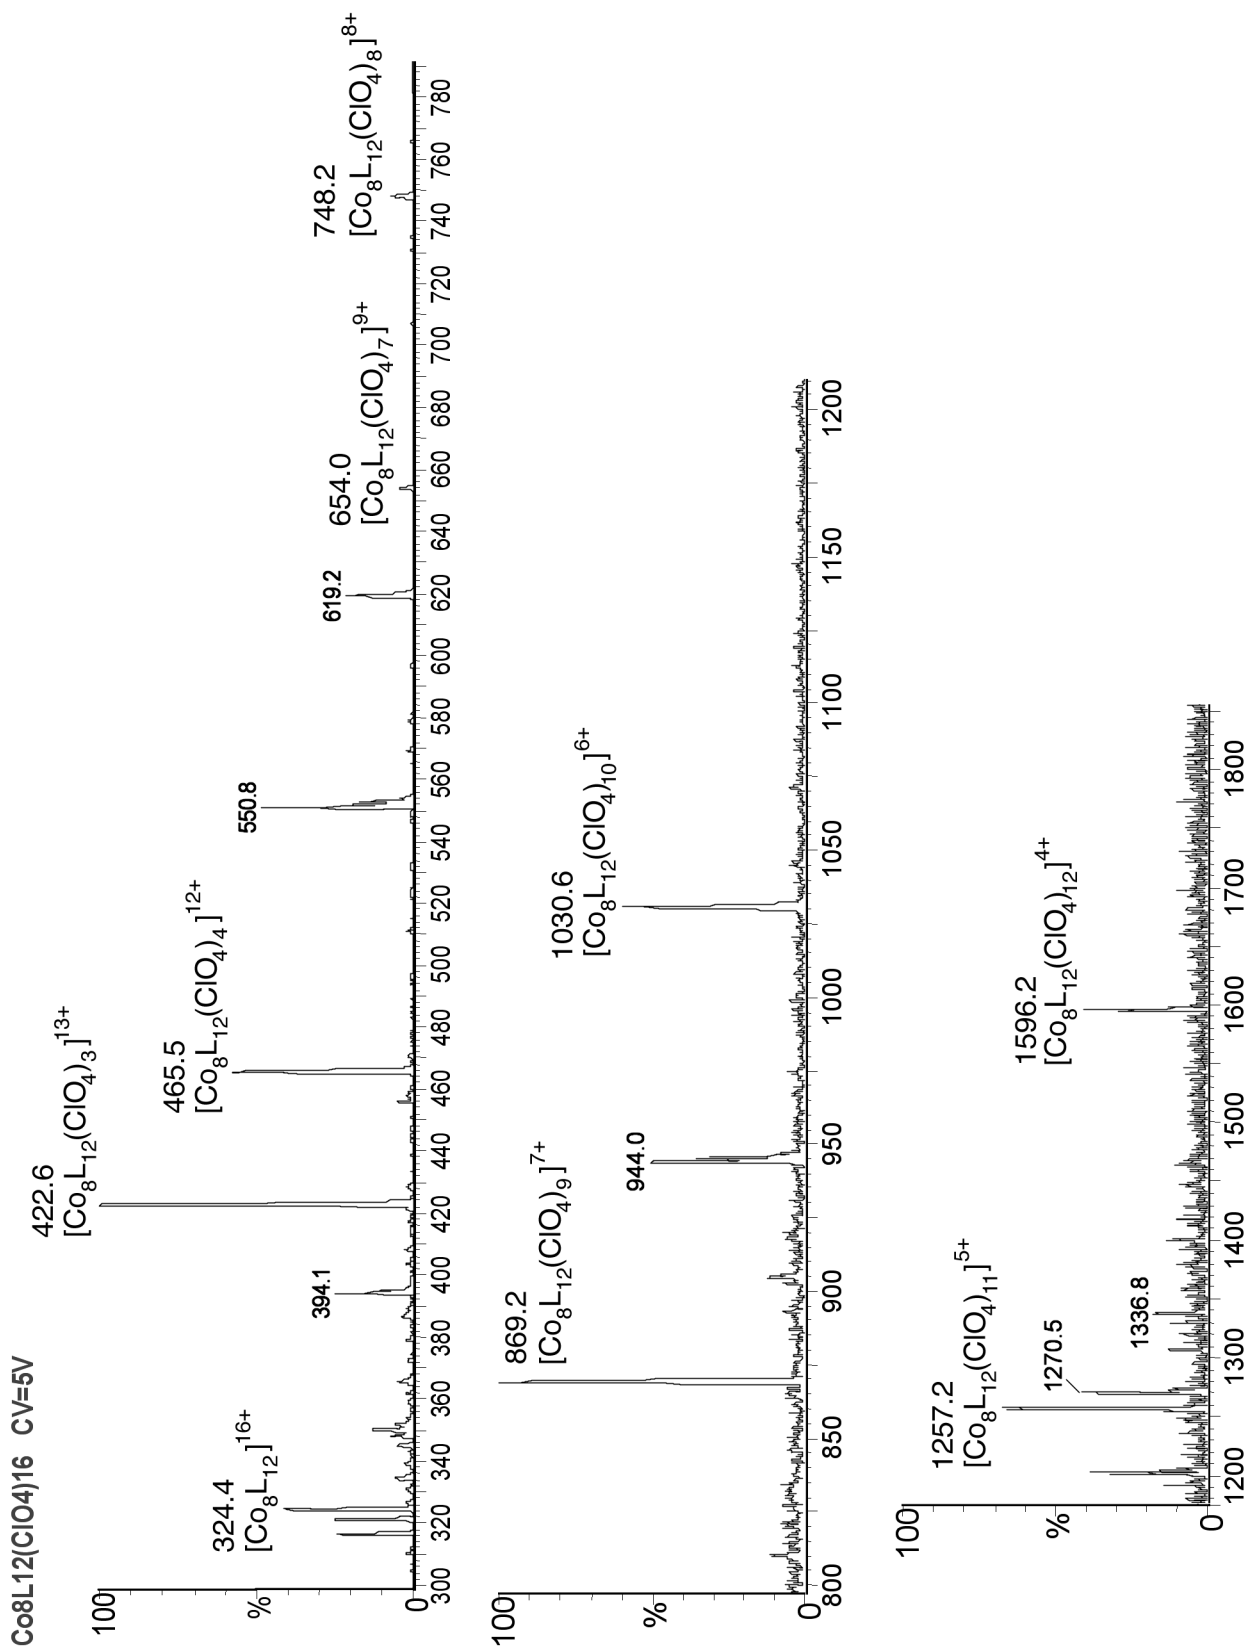

**Figure S2.** Electrospray mass spectrum (MeCN, cone voltage 5V) of  $[\text{Co}_8(\text{L}^1)_{12}](\text{ClO}_4)_{16}$

Supplement: b307172n.pdf [file b307172n.pdf]
